# Supplementary material
Source: PubMed Central journal article supplement (PMC9357182)
Supplement: NIHMS1821287-supplement-1821287_Sup_Info.pdf [file NIHMS1821287-supplement-1821287_Sup_Info.pdf]

## Supplementary Information

### **Recording gene expression order in DNA by CRISPR addition of retron barcodes**

**Authors:** Santi Bhattarai-Kline<sup>1</sup>, Sierra K. Lear<sup>1,2</sup>, Chloe B. Fishman<sup>1</sup>, Santiago C. Lopez<sup>1,2</sup>, Elana Lockshin<sup>3</sup>, Max G. Schubert<sup>4,5</sup>, Jeff Nivala<sup>6</sup>, George Church<sup>4,5</sup>, Seth L. Shipman<sup>1,7\*</sup>

\*Correspondence to: [seth.shipman@gladstone.ucsf.edu](mailto:seth.shipman@gladstone.ucsf.edu)

This PDF file includes:

Supplementary Figure 1, Uncropped gels

Supplementary Tables 1 to 4

**Supplemental Figure 1, Uncropped gels from main figures.**

**Figure 1c**

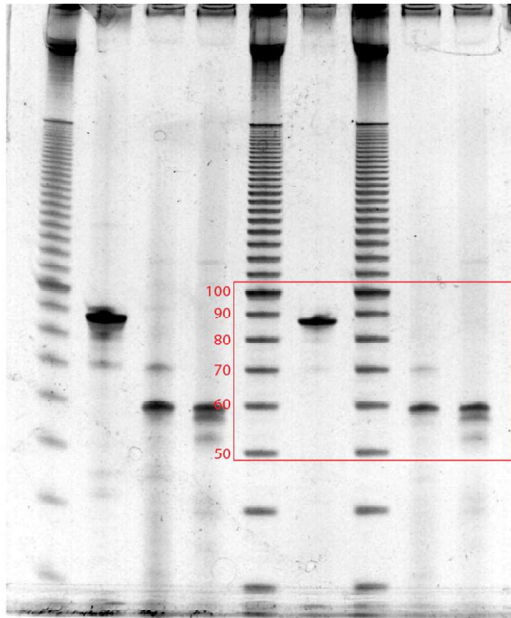

**Figure 3c**

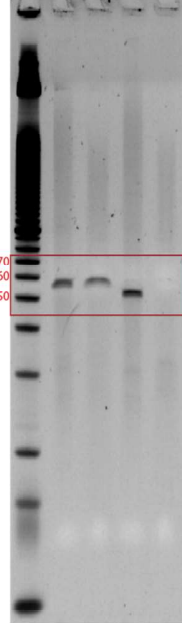

**Figure 3h**

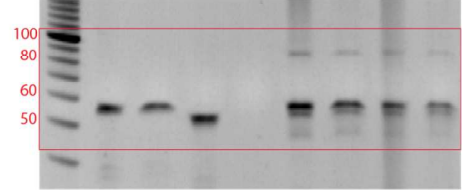

## Supplementary Table 1, Statistics

| Figure 1 |                                    |                                                                                            |                                                 |         |                 |
|----------|------------------------------------|--------------------------------------------------------------------------------------------|-------------------------------------------------|---------|-----------------|
| Panel    | Biological Replicates              | Comparison                                                                                 | Test                                            | P value | P value summary |
| e        | 3                                  | v32 with RT versus without RT                                                              | unpaired t test                                 | <0.0001 | ****            |
|          | 3                                  | v35 with RT versus without RT                                                              | unpaired t test                                 | 0.0002  | ***             |
| f        | 5                                  | a1/a2 length: 12 versus 27                                                                 | unpaired t test                                 | 0.0082  | **              |
| Figure 2 |                                    |                                                                                            |                                                 |         |                 |
| Panel    | Biological Replicates              | Comparison                                                                                 | Test                                            | P value | P value summary |
| b        | 3                                  | <b>Non-retron derived spacers: effect of condition</b>                                     | <b>one-way ANOVA</b>                            | 0.5707  | ns              |
|          |                                    | <b>Retron derived spacers: effect of condition</b>                                         | <b>one-way ANOVA</b>                            | 0.0004  | ***             |
|          |                                    | Follow-up: v35 "A" with RT versus without RT                                               | Dunnett's multiple comparisons test (corrected) | <0.0001 | ****            |
|          |                                    | Follow-up: v35 "A" versus "B" 1                                                            | Dunnett's multiple comparisons test (corrected) | 0.029   | *               |
|          |                                    | Follow-up: v35 "A" versus "B" 2                                                            | Dunnett's multiple comparisons test (corrected) | 0.0229  | *               |
|          |                                    | Follow-up: v35 "A" versus "B" 3                                                            | Dunnett's multiple comparisons test (corrected) | 0.0119  | *               |
|          |                                    | Follow-up: v35 "A" versus "B" 4                                                            | Dunnett's multiple comparisons test (corrected) | 0.0357  | *               |
|          |                                    | Follow-up: v35 "A" versus "B" 5                                                            | Dunnett's multiple comparisons test (corrected) | 0.0287  | *               |
|          |                                    | Follow-up: v35 "A" versus "B" 6                                                            | Dunnett's multiple comparisons test (corrected) | 0.2986  | ns              |
|          |                                    | Follow-up: v35 "A" versus "B" 7                                                            | Dunnett's multiple comparisons test (corrected) | 0.086   | ns              |
|          |                                    | Follow-up: v35 "A" versus "B" 8                                                            | Dunnett's multiple comparisons test (corrected) | 0.0007  | ***             |
| Figure 3 |                                    |                                                                                            |                                                 |         |                 |
| Panel    | Biological Replicates              | Comparison                                                                                 | Test                                            | P value | P value summary |
| b        | 4-5                                | <b>Effect of source (retron versus oligo)</b>                                              | <b>two-way ANOVA</b>                            | <0.0001 | ****            |
|          |                                    | <b>Effect of location (LP/M/LD)</b>                                                        | <b>two-way ANOVA</b>                            | <0.0001 | ****            |
|          |                                    | Follow-up: retron versus oligo, LP +/- ratio                                               | Sidak's multiple comparisons test (corrected)   | >0.9999 | ns              |
|          |                                    | Follow-up: retron versus oligo, M +/- ratio                                                | Sidak's multiple comparisons test (corrected)   | 0.9985  | ns              |
|          |                                    | Follow-up: retron versus oligo, M +/- ratio                                                | Sidak's multiple comparisons test (corrected)   | <0.0001 | ****            |
| d        | 2-5 comparison to oligo in panel b | <b>Effect of source (retron versus oligo)</b>                                              | <b>two-way ANOVA</b>                            | 0.0439  | *               |
|          |                                    | <b>Effect of location (LP/M/LD)</b>                                                        | <b>two-way ANOVA</b>                            | <0.0001 | ****            |
|          |                                    | Follow-up: retron versus oligo, LP +/- ratio                                               | Sidak's multiple comparisons test (corrected)   | >0.9999 | ns              |
|          |                                    | Follow-up: retron versus oligo, M +/- ratio                                                | Sidak's multiple comparisons test (corrected)   | >0.9999 | ns              |
|          |                                    | Follow-up: retron versus oligo, M +/- ratio                                                | Sidak's multiple comparisons test (corrected)   | 0.005   | **              |
| e        | 2-5                                | <b>Effect of condition</b>                                                                 | <b>one-way ANOVA</b>                            | 0.33    | ns              |
|          |                                    | Follow-up: oligo versus retron -DBR1                                                       | Dunnett's multiple comparisons test (corrected) | 0.2858  | ns              |
|          |                                    | Follow-up: oligo versus retron +LDBR1                                                      | Dunnett's multiple comparisons test (corrected) | 0.5715  | ns              |
| g        | 3                                  | <b>Effect of source (retron versus oligo)</b>                                              | <b>two-way ANOVA</b>                            | 0.0394  | *               |
|          |                                    | <b>Effect of location (LP/M/LD)</b>                                                        | <b>two-way ANOVA</b>                            | 0.0083  | **              |
|          |                                    | Follow-up: retron versus oligo, LP +/- ratio                                               | Sidak's multiple comparisons test (corrected)   | >0.9999 | ns              |
|          |                                    | Follow-up: retron versus oligo, M +/- ratio                                                | Sidak's multiple comparisons test (corrected)   | >0.9999 | ns              |
|          |                                    | Follow-up: retron versus oligo, M +/- ratio                                                | Sidak's multiple comparisons test (corrected)   | 0.0053  | **              |
| i        | 3                                  | Ecod with RT versus without RT                                                             | unpaired t test                                 | 0.0197  | *               |
| Figure 4 |                                    |                                                                                            |                                                 |         |                 |
| Panel    | Biological Replicates              | Comparison                                                                                 | Test                                            | P value | P value summary |
| b        | 4                                  | "A" (aTc) versus "B" (Cho)                                                                 | unpaired t test                                 | 0.2704  | ns              |
| c        | 4                                  | <b>Effect of Time on Retron-Derived Acquisition Rate (overall)</b>                         | <b>two-way ANOVA</b>                            | 0.4172  | ns              |
|          |                                    | <b>Effect of Source on Retron-Derived Acquisition Rate (overall)</b>                       | <b>two-way ANOVA</b>                            | 0.9312  | ns              |
|          |                                    | <b>Effect of Interaction Between Time and Source on Retron-Derived Acquisition Rate</b>    | <b>two-way ANOVA</b>                            | 0.0007  | ***             |
|          |                                    | Follow-up: Rate of "A" Acquisitions, 24h versus 48h                                        | Sidak's multiple comparisons test (corrected)   | 0.005   | **              |
|          |                                    | Follow-up: Rate of "B" Acquisitions, 24h versus 48h                                        | Sidak's multiple comparisons test (corrected)   | 0.0445  | *               |
| d        | 4                                  | <b>Effect of Time on Retron-Derived Acquisition Rate (overall)</b>                         | <b>two-way ANOVA</b>                            | 0.0002  | ***             |
|          |                                    | <b>Effect of Source on Retron-Derived Acquisition Rate (overall)</b>                       | <b>two-way ANOVA</b>                            | >0.9999 | ns              |
|          |                                    | <b>Effect of Interaction Between Time and Source on Retron-Derived Acquisition Rate</b>    | <b>two-way ANOVA</b>                            | <0.0001 | ****            |
|          |                                    | Follow-up: Rate of "A" Acquisitions, 24h versus 48h                                        | Sidak's multiple comparisons test (corrected)   | <0.0001 | ****            |
|          |                                    | Follow-up: Rate of "B" Acquisitions, 24h versus 48h                                        | Sidak's multiple comparisons test (corrected)   | 0.888   | ns              |
| e        | 4                                  | <b>Effect of Time on Non-Retron-Derived Acquisition Rate (overall)</b>                     | <b>two-way ANOVA</b>                            | 0.0633  | ns              |
|          |                                    | <b>Effect of Inducer Order on Non-Retron-Derived Acquisition Rate (overall)</b>            | <b>two-way ANOVA</b>                            | >0.9999 | ns              |
|          |                                    | <b>Effect of Interaction Between Time and Order on Non-Retron-Derived Acquisition Rate</b> | <b>two-way ANOVA</b>                            | 0.5455  | ns              |
|          |                                    | Follow-up: Rate of "N" Acquisitions A->B, 24h versus 48h                                   | Sidak's multiple comparisons test (corrected)   | 0.1602  | ns              |
|          |                                    | Follow-up: Rate of "N" Acquisitions B->A, 24h versus 48h                                   | Sidak's multiple comparisons test (corrected)   | 0.5567  | ns              |
| g        | 4                                  | "A" (Sal) versus "B" (aTc)                                                                 | unpaired t test                                 | <0.0001 | ****            |
| h        | 3                                  | <b>Effect of Time on Retron-Derived Acquisition Rate (overall)</b>                         | <b>two-way ANOVA</b>                            | 0.0003  | ***             |
|          |                                    | <b>Effect of Source on Retron-Derived Acquisition Rate (overall)</b>                       | <b>two-way ANOVA</b>                            | >0.9999 | ns              |
|          |                                    | <b>Effect of Interaction Between Time and Source on Retron-Derived Acquisition Rate</b>    | <b>two-way ANOVA</b>                            | 0.005   | **              |
|          |                                    | Follow-up: Rate of "A" Acquisitions, 24h versus 48h                                        | Sidak's multiple comparisons test (corrected)   | 0.3036  | ns              |
|          |                                    | Follow-up: Rate of "B" Acquisitions, 24h versus 48h                                        | Sidak's multiple comparisons test (corrected)   | 0.0002  | ***             |
| i        | 4                                  | <b>Effect of Time on Retron-Derived Acquisition Rate (overall)</b>                         | <b>two-way ANOVA</b>                            | 0.0473  | *               |
|          |                                    | <b>Effect of Source on Retron-Derived Acquisition Rate (overall)</b>                       | <b>two-way ANOVA</b>                            | 0.392   | ns              |
|          |                                    | <b>Effect of Interaction Between Time and Source on Retron-Derived Acquisition Rate</b>    | <b>two-way ANOVA</b>                            | 0.0002  | ***             |
|          |                                    | Follow-up: Rate of "A" Acquisitions, 24h versus 48h                                        | Sidak's multiple comparisons test (corrected)   | 0.1003  | ns              |
|          |                                    | Follow-up: Rate of "B" Acquisitions, 24h versus 48h                                        | Sidak's multiple comparisons test (corrected)   | 0.0004  | ***             |
| j        | 4                                  | <b>Effect of Time on Non-Retron-Derived Acquisition Rate (overall)</b>                     | <b>two-way ANOVA</b>                            | 0.1855  | ns              |
|          |                                    | <b>Effect of Inducer Order on Non-Retron-Derived Acquisition Rate (overall)</b>            | <b>two-way ANOVA</b>                            | 0.5823  | ns              |
|          |                                    | <b>Effect of Interaction Between Time and Order on Non-Retron-Derived Acquisition Rate</b> | <b>two-way ANOVA</b>                            | 0.0007  | ***             |
|          |                                    | Follow-up: Rate of "N" Acquisitions A->B, 24h versus 48h                                   | Sidak's multiple comparisons test (corrected)   | 0.09    | ns              |
|          |                                    | Follow-up: Rate of "N" Acquisitions B->A, 24h versus 48h                                   | Sidak's multiple comparisons test (corrected)   | 0.0014  | **              |
| l        | 6                                  | <b>Effect of Order (A-&gt;B vs B-&gt;A)</b>                                                | <b>two-way ANOVA</b>                            | <0.0001 | ****            |
|          |                                    | <b>Effect of Rule</b>                                                                      | <b>two-way ANOVA</b>                            | 0.7179  | ns              |
|          |                                    | <b>Effect of Interaction</b>                                                               | <b>two-way ANOVA</b>                            | 0.0044  | **              |
|          |                                    | Follow-up: A/N (A->B vs B->A)                                                              | Sidak's multiple comparisons test (corrected)   | <0.0001 | ****            |
|          |                                    | Follow-up: N/B (A->B vs B->A)                                                              | Sidak's multiple comparisons test (corrected)   | 0.236   | ns              |
|          |                                    | Follow-up: A/B (A->B vs B->A)                                                              | Sidak's multiple comparisons test (corrected)   | <0.0001 | ****            |
|          |                                    | Follow-up: All (A->B vs B->A)                                                              | Sidak's multiple comparisons test (corrected)   | 0.0003  | ***             |
|          |                                    | <b>A-&gt;B Overall Values Different Than 0</b>                                             | <b>one-sample t test</b>                        | 0.0065  | **              |
|          |                                    | <b>B-&gt;A Overall Values Different Than 0</b>                                             | <b>one-sample t test</b>                        | 0.0363  | *               |
| m        | 5                                  | <b>Effect of Order (A-&gt;B vs B-&gt;A)</b>                                                | <b>two-way ANOVA</b>                            | <0.0001 | ****            |
|          |                                    | <b>Effect of Rule</b>                                                                      | <b>two-way ANOVA</b>                            | 0.9252  | ns              |
|          |                                    | <b>Effect of Interaction</b>                                                               | <b>two-way ANOVA</b>                            | 0.0017  | **              |
|          |                                    | Follow-up: A/N (A->B vs B->A)                                                              | Sidak's multiple comparisons test (corrected)   | 0.0011  | **              |
|          |                                    | Follow-up: N/B (A->B vs B->A)                                                              | Sidak's multiple comparisons test (corrected)   | 0.1054  | ns              |
|          |                                    | Follow-up: A/B (A->B vs B->A)                                                              | Sidak's multiple comparisons test (corrected)   | <0.0001 | ****            |
|          |                                    | Follow-up: All (A->B vs B->A)                                                              | Sidak's multiple comparisons test (corrected)   | <0.0001 | ****            |
|          |                                    | <b>A-&gt;B Overall Values Different Than 0</b>                                             | <b>one-sample t test</b>                        | 0.0327  | *               |
|          |                                    | <b>B-&gt;A Overall Values Different Than 0</b>                                             | <b>one-sample t test</b>                        | 0.0116  | *               |

## Supplementary Table 2, Strains

| Name        | Species        | Parental Line | Genotype                                                                                                                                            | Method                                                                                          |
|-------------|----------------|---------------|-----------------------------------------------------------------------------------------------------------------------------------------------------|-------------------------------------------------------------------------------------------------|
| NEB 5-alpha | <i>E. coli</i> | DH5α          | <i>fhuA2 Δ(argF-lacZ)U169 phoA glnV44 Δ80 Δ(lacZ)M15 gyrA96 recA1 relA1 endA1 thi-1 hsdR17</i>                                                      |                                                                                                 |
| BL21-AI     | <i>E. coli</i> | BL21          | <i>F-ompT hsdSB (rB- mB-) gal dcm araB::T7RNAP-tetA</i>                                                                                             |                                                                                                 |
| bSLS.114    | <i>E. coli</i> | BL21-AI       | <i>E. coli B F- ompT gal dcm lon hsdSB(rB<sup>-</sup> mB<sup>-</sup>) [malB<sup>+</sup>]<sub>K-12</sub> (λ<sup>S</sup>) araB::T7RNAP-tetA ΔEco1</i> | lambda Red recombinase mediated insertion of chloramphenicol resistance, marker excision by FLP |
| bMS.346     | <i>E. coli</i> | MG1655        | <i>MG1655 galKL187TAAL188TGA Δexol ΔrecJ araB<sup>A</sup>:pBAD&gt;T7RNAP;Tet</i>                                                                    | lambda Red recombination and phage P1 transduction                                              |

## Supplementary Table 3, Plasmids

| Name     | Genes                                                                      | Promoter             | Inducer (working concentration)                                  | Used in (panels)         |
|----------|----------------------------------------------------------------------------|----------------------|------------------------------------------------------------------|--------------------------|
| pWUR.1+2 | Cas1 + Cas2 (Yosef et al. 2012)                                            | T7/lac               | L-arabinose (2 mg/mL), IPTG (1 mM)                               | 3g-i                     |
| pSLS.400 | Eco4 RT                                                                    | pMphR                | Erythromycin (400 μM)                                            | 3g-i                     |
| pSLS.402 | Eco1 RT                                                                    | pMphR                | Erythromycin (400 μM)                                            | 1c, 1e-i, 2b-d, 3b-e, 3h |
| pSLS.405 | 1: Eco1 ncRNA + Eco1 RT; 2: Cas1 + Cas2                                    | 1: T7/lac; 2: T7/lac | L-arabinose (2 mg/mL), IPTG (1 mM)                               | 1c, 3c, 3h               |
| pSLS.407 | 1: Eco1 ncRNA v32; 2: Cas1 + Cas2                                          | 1: T7/lac; 2: T7/lac | L-arabinose (2 mg/mL), IPTG (1 mM)                               | 1c, 1e                   |
| pSLS.408 | 1: Eco1 ncRNA v35; 2: Cas1 + Cas2                                          | 1: T7/lac; 2: T7/lac | L-arabinose (2 mg/mL), IPTG (1 mM)                               | 1c, 1e-f                 |
| pSLS.416 | 1: Eco1 ncRNA v35, long a1/a2; 2: Cas1 + Cas2                              | 1: T7/lac; 2: T7/lac | L-arabinose (2 mg/mL), IPTG (1 mM)                               | 1f-i, 2b-d, 3b, 3d-e     |
| pSLS.419 | 1: Eco4 ncRNA; 2: Cas1 + Cas2                                              | 1: T7/lac; 2: T7/lac | L-arabinose (2 mg/mL), IPTG (1 mM)                               | 3g-i                     |
| pSBK.009 | 1: Eco1 ncRNA v35, long a1/a2, barcode 1 (CCT-AGG); 2: Cas1 + Cas2         | 1: T7/lac; 2: T7/lac | L-arabinose (2 mg/mL), IPTG (1 mM)                               | 2b-d                     |
| pSBK.010 | 1: Eco1 ncRNA v35, long a1/a2, barcode 2 (GCT-AGC); 2: Cas1 + Cas2         | 1: T7/lac; 2: T7/lac | L-arabinose (2 mg/mL), IPTG (1 mM)                               | 2b-d                     |
| pSBK.011 | 1: Eco1 ncRNA v35, long a1/a2, barcode 3 (CTG-CAG); 2: Cas1 + Cas2         | 1: T7/lac; 2: T7/lac | L-arabinose (2 mg/mL), IPTG (1 mM)                               | 2b-d                     |
| pSBK.012 | 1: Eco1 ncRNA v35, long a1/a2, barcode 4 (GTG-CAC); 2: Cas1 + Cas2         | 1: T7/lac; 2: T7/lac | L-arabinose (2 mg/mL), IPTG (1 mM)                               | 2b-d                     |
| pSBK.013 | 1: Eco1 ncRNA v35, long a1/a2, barcode 5 (ACG-CGT); 2: Cas1 + Cas2         | 1: T7/lac; 2: T7/lac | L-arabinose (2 mg/mL), IPTG (1 mM)                               | 2b-d                     |
| pSBK.014 | 1: Eco1 ncRNA v35, long a1/a2, barcode 6 (CAG-TAG); 2: Cas1 + Cas2         | 1: T7/lac; 2: T7/lac | L-arabinose (2 mg/mL), IPTG (1 mM)                               | 2b-d                     |
| pSBK.015 | 1: Eco1 ncRNA v35, long a1/a2, barcode 7 (GAG-CTC); 2: Cas1 + Cas2         | 1: T7/lac; 2: T7/lac | L-arabinose (2 mg/mL), IPTG (1 mM)                               | 2b-d                     |
| pSBK.016 | 1: Eco1 ncRNA v35, long a1/a2, , barcode 8 (GCT-TGC); 2: Cas1 + Cas2       | 1: T7/lac; 2: T7/lac | L-arabinose (2 mg/mL), IPTG (1 mM)                               | 2b-d                     |
| pSBK.079 | 1: Eco1 RT; 2: Cas1 + Cas2                                                 | 1: J23115; 2: T7/lac | L-arabinose (2 mg/mL), IPTG (1 mM)                               | 4b-e, 4g-j, 4l-m         |
| pSBK.134 | A: Eco1 ncRNA v35, long a1/a2; B: Eco1<br>ncRNA v35, long a1/a2, barcode 6 | A: pTet*; B: pBetI   | A: anhydrotetracycline (100 ng/mL); B: choline chloride (100 μM) | 4b-e, 4l                 |
| pSBK.136 | A: Eco1 ncRNA v35, long a1/a2; B: Eco1<br>ncRNA v35, long a1/a2, barcode 6 | A: pSalTTC; B: pTet* | A: sodium salicylate (1 mM); B: anhydrotetracycline (100 ng/mL)  | 4g-j, 4m                 |

## Supplementary Table 4, Primers

| Name             | Sequence                                                               | Purpose                                                                                                   |
|------------------|------------------------------------------------------------------------|-----------------------------------------------------------------------------------------------------------|
| SPCR_MiSeq3_fow1 | CTTCCCTACACGACGCTCTCCGATCTNCAATTAATAAATAGGTTATGTTAGAGGTGTTCC           | Forward primer with Illumina edeptcr (#1 of set of 5) used to amplify BL21-AI CRISPR array for sequencing |
| SPCR_MiSeq3_fow2 | CTTCCCTACACGACGCTCTCCGATCTNCAATTAATAAATAGGTTATGTTAGAGGTGTTCC           | Forward primer with Illumina adapter (#2 of set of 5) used to amplify BL21-AI CRISPR array for sequencing |
| SPCR_MiSeq3_low3 | CTTCCCTACACGACGCTCTCCGATCTNCAATTAATAAATAGGTTATGTTAGAGGTGTTCC           | Forward primer with Illumina adapter (#3 of set of 5) used to amplify BL21-AI CRISPR array for sequencing |
| SPCR_MiSeq3_low4 | CTTCCCTACACGACGCTCTCCGATCTNCAATTAATAAATAGGTTATGTTAGAGGTGTTCC           | Forward primer with Illumina adapter (#4 of set of 5) used to amplify BL21-AI CRISPR array for sequencing |
| SPCR_MiSeq3_low5 | CTTCCCTACACGACGCTCTCCGATCTNCAATTAATAAATAGGTTATGTTAGAGGTGTTCC           | Forward primer with Illumina adapter (#5 of set of 5) used to amplify BL21-AI CRISPR array for sequencing |
| SPCR_MiSeq3_rev  | GGAGTTCAGACGCTGTCTCTCCGATCTGTGCAACATCGTTCCTGATTGTC                     | Reverse primer with Illumina adapter used to amplify BL21-AI CRISPR array for sequencing                  |
| Eco1_v35_oligo   | GTCAGAAAAACGGGTGGAGAGGTTGCTGCAACTCTCCATTTTCTGTAACTCAGA                 | Test acquisition behavior of Eco1 v35 by electroporation                                                  |
| Eco4_wt_oligo    | AGCCGGGAACAACCTTTTGTATCCGCAACTGATTGCGGCTCAAAAGTTTGTCCGCAACTGTAATGTAATC | Test acquisition behavior of Eco4 by electroporation                                                      |
